# Supplementary material for: The Prevalence of Helicobacter Pylori Infection and the Associated Demographic and Histopathological Characteristics as seen in Patients Diagnosed with Chronic Gastritis in Uganda.
Source: Research Square preprint supplement (doi:10.21203/rs.3.rs-7371222/v1), 2025-09-02
Supplement: Supplementary file 1 [file 122ea1bbfb3a899a1a00c188.docx]

**S1: Tissue Preparation Steps**

1. Sections of 4 microns thick were cut on a microtome machine.
2. The sections were spread on the surface of water (37-39ºC) below the melting point of wax to remove wrinkles.
3. Sections were mounted onto clean glass slides which were labelled with unique identification numbers.
4. Sections were then fixed onto the slides by dry heating in an oven at (55-65ºC) for 30-60.
