# Supplementary material for: The Prevalence of Helicobacter Pylori Infection and the Associated Demographic and Histopathological Characteristics as seen in Patients Diagnosed with Chronic Gastritis in Uganda.
Source: Research Square preprint supplement (doi:10.21203/rs.3.rs-7371222/v1), 2025-09-02
Supplement: Supplementary file 2 [file 3509d9c1c0b19fa2a4dec380.docx]

**S4: Modified Sydney System for Classification and Grading of Chronic Gastritis**

| Feature | Grading of severity | | | |
| --- | --- | --- | --- | --- |
| 0 (None) | 1(Mild) | 2(Moderate) | 3(Severe) |
| Chronic inflammation | 2–5 lymphocyte, plasma, and macrophage ×40 | 6–10 cells ×40 | 11–20 cells ×40 | ≥21 cells ×40 |
| Activity Neutrophil | None | 2-4 cells x 40 | 5-10 cells x 40 | ≥11 cells x 40 |
| Atrophy | None | Mild | Moderate | Severe |
| Intestinal metaplasia | None | <1/3 of mucosa involved | 1/3–2/3 of mucosa involved | >2/3 of mucosa involved |
| *H. pylori* density | None | 1–3 organisms | A layer of bacterium | Cluster of bacteria |

X40 means Magnification X400

**Key to Appendix 1**

**Chronic Inflammation:**

Grade 0: No inflammation

Grade 1: Mild inflammation (sparse lymphocytes and plasma cells in the lamina propria)

Grade 2: Moderate inflammation (increased lymphocytes and plasma cells with mild neutrophilic infiltration)

Grade 3: Severe inflammation (marked increase in lymphocytes, plasma cells, and neutrophils)

**Activity (Neutrophilic Infiltration)**

Grade 0: No activity

Grade 1: Mild activity (1-2 polymorphonuclear neutrophils / HPF )

Grade 2: Moderate activity (3-10 polymorphonuclear neutrophils / HPF)

Grade 3: Severe activity (≥11 polymorphonuclear neutrophils / HPF)

**Atrophy:**

Grade 0: No atrophy

Grade 1: Mild atrophy (limited to the superficial mucosa)

Grade 2: Moderate atrophy (involving the glandular epithelium with preservation of some glands)

Grade 3: Severe atrophy (extensive glandular loss, with replacement by fibrous tissue)

**Intestinal Metaplasia:**

Grade 0: No intestinal metaplasia

Grade 1: Mild intestinal metaplasia (rare goblet cells in the surface epithelium)

Grade 2: Moderate intestinal metaplasia (goblet cells present in the surface epithelium)

Grade 3: Severe intestinal metaplasia (extensive goblet cell metaplasia with or without Paneth cells)

***H. pylori* Density:**

Grade 0: No *H. pylori* organisms observed.

Grade 1: Mild density (few organisms observed in the surface mucus layer).

Grade 2: Moderate density (organisms present in the surface mucus layer and glandular lumina).

Grade 3: Severe density (abundant organisms in the surface mucus layer and glandular lumina).
