# Supplementary material for: The Prevalence of Helicobacter Pylori Infection and the Associated Demographic and Histopathological Characteristics as seen in Patients Diagnosed with Chronic Gastritis in Uganda.
Source: Research Square preprint supplement (doi:10.21203/rs.3.rs-7371222/v1), 2025-09-02
Supplement: Supplementary file 3 [file 5eb5f20a18b1794b33c22200.docx]

**S3: Modified Giemsa staining protocol for paraffin embedded blocks**

***Procedure***

1. The tissue sections were deparaffinized by placing the slides in 2 changes of xylene for 5 minutes each.
2. The slides were transferred to absolute alcohol for 5 minutes, then to 95% and 90% for 5 minutes each. Finally, the slides were rinsed in distilled water for 5 minutes.
3. The rehydrated slides sections were placed in a staining dish containing the prepared Giemsa stain solution and incubated for 30 minutes.
4. The slides from the Giemsa stain solution and rinsed in distilled water to remove excess stain.
5. The slides were differentiated in 95% ethanol for 10 seconds and 2 changes in absolute ethanol for 30 seconds each.
6. The slides were cleared in Xylene and mounted under a coverslip using DPX.

***Interpretation***

1. Nuclei : red-violet, pink
2. Basophilic cytoplasm: pale blue to dark blue
3. Acidophilic cytoplasm: pale red to pink
4. Bacteria : blue to pink.
