# Supplementary material for: The Prevalence of Helicobacter Pylori Infection and the Associated Demographic and Histopathological Characteristics as seen in Patients Diagnosed with Chronic Gastritis in Uganda.
Source: Research Square preprint supplement (doi:10.21203/rs.3.rs-7371222/v1), 2025-09-02
Supplement: Supplementary file 4 [file 6f461c33b0d1c663299bf64e.docx]

**S2:** **Standard Harris H&E staining protocol for paraffin blocks**

***Procedure***

1. The slides sections were dewaxed for 5 minutes through two changes in xylene and hydrated in a series of graded alcohol (100%, 95%, 90%, 75%, and 70%) to water.
2. The slides sections were rinsed in tap water and then stained with hematoxylin for 5 minutes.
3. The slides sections were then washed in running tap water for at least 5 minutes.
4. The slides sections were differentiated in 1% acid alcohol (1% Hydrochloric acid in 70% alcohol) for 10 seconds.
5. The slides Sections were washed in running tap water and left to blue for 10 minutes.
6. The slides Sections were counter stained with eosin 1% for 10 minutes.
7. The slides sections were washed in running tap water for 10 minutes.
8. The slides Sections were dehydrated in a series of ascending concentration of alcohol (80%, 90%, 95%, 100%, 100%) for 5 seconds each.
9. The slides sections were washed in running tap water for 10 minutes.
10. The slides section was cleared in two changes of xylene for 2 minutes each and mounted under cover slips using DPX.

***Interpretation***

1. Cytoplasm – Pink, Nucleus – Blue,
2. Muscle fibers - Deep pink, Red blood cells - Orange or red, and Fibrin - Deep pink.
