# Supplementary figures and images for: The Prevalence of Helicobacter Pylori Infection and the Associated Demographic and Histopathological Characteristics as seen in Patients Diagnosed with Chronic Gastritis in Uganda.
Source: Research Square preprint supplement (doi:10.21203/rs.3.rs-7371222/v1), 2025-09-02

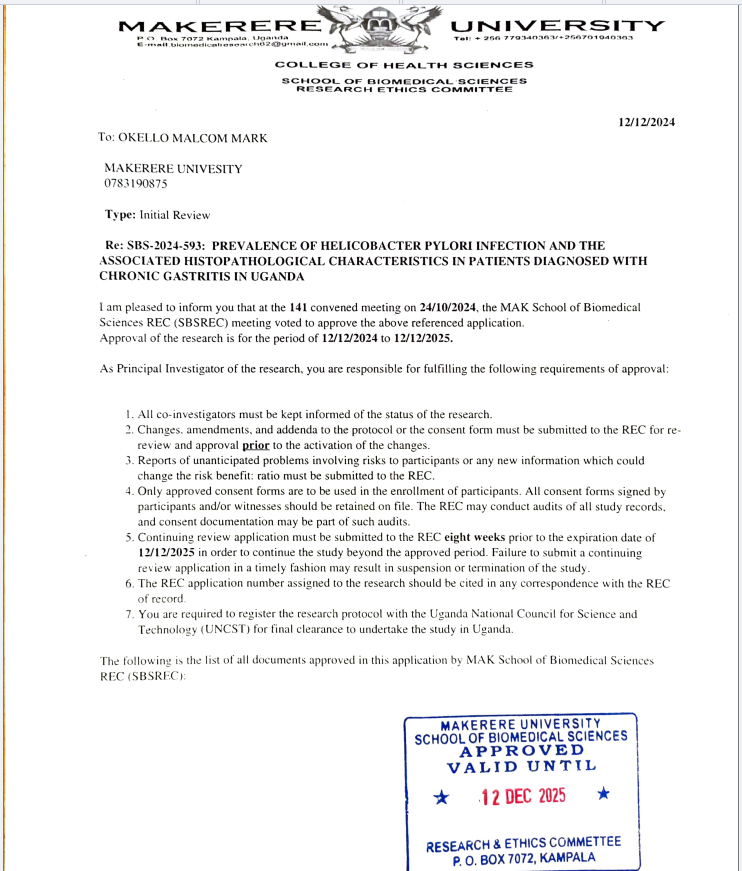
S6 : SBSREC Approval.


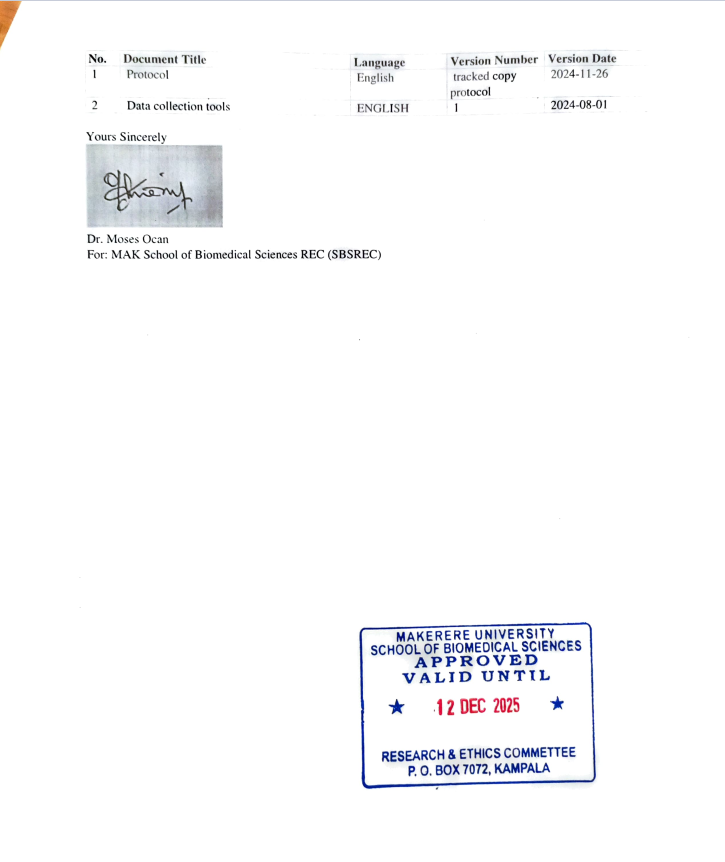

Supplement: Supplementary file 5 [file a41e2e986c41b272cb2b95ac.docx]

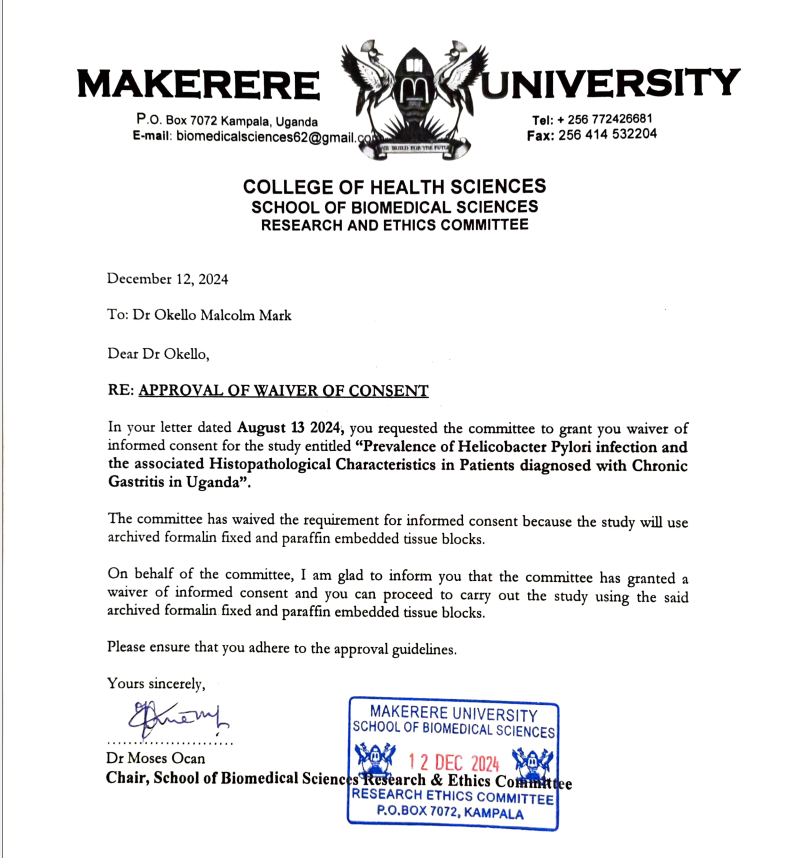
S7: Waiver Of Consent.

Supplement: Supplementary file 6 [file df0a0061c69dfb97f6a448a9.docx]

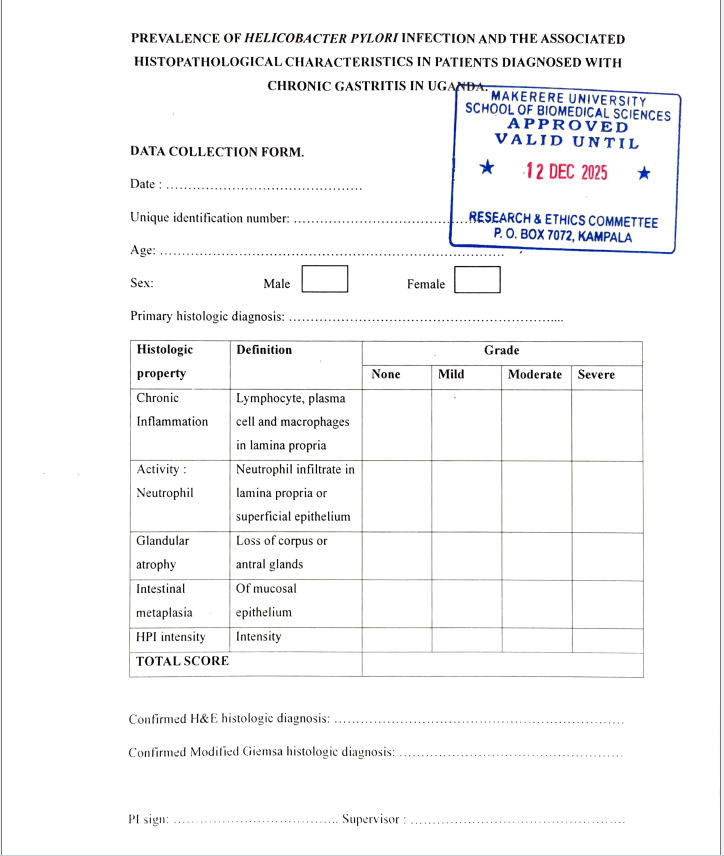
S5 : Data collection tool

Supplement: Supplementary file 7 [file fc12c9eda6f27446b00c6365.docx]
